# Supplementary material for: Epitranscriptomics: Correlation of N6-methyladenosine RNA methylation and pathway dysregulation in the hippocampus of HIV transgenic rats
Source: PLoS One. 2019 Jan 17;14(1):e0203566. doi: 10.1371/journal.pone.0203566 (PMC6336335; doi:10.1371/journal.pone.0203566)
Supplement: S6 Table — (XLSX) [file pone.0203566.s006.xlsx]

## Sheet: supplementary table 6
S6 Table: genes with both significant change in methylation and expression
	baseMean_Met	log2FoldChange_Met	lfcSE_Met	stat_Met	pvalue_Met	padj_Met	baseMean_Exp	log2FoldChange_Exp	lfcSE_Exp	stat_Exp	pvalue_Exp	padj_Exp
FBXW11	1227.46	-0.901507	0.0733681	-12.2874	1.05797e-34	7.14656e-31	2063.39	-0.896656	0.0564795	-15.8758	9.32547e-57	1.22276e-52
NRG3	1007.02	0.391404	0.0943561	4.14816	3.3516e-05	0.0125778	319.366	0.519503	0.0715396	7.26175	3.82103e-13	2.50507e-09
UBTD2	229.474	-0.513025	0.0922462	-5.56147	2.67506e-08	4.5175e-05	182.664	-0.566638	0.0809912	-6.99628	2.6284e-12	8.61589e-09
KCNIP1	313.139	0.363992	0.0966545	3.76591	0.000165944	0.0448379	328.542	0.533597	0.081086	6.58063	4.68472e-11	1.17691e-07
CLDN2	3116.79	0.45006	0.0946917	4.7529	2.00521e-06	0.00123138	837.599	0.509108	0.0804298	6.32984	2.4541e-10	4.59688e-07
PPL	855.555	-0.517879	0.0952527	-5.4369	5.42161e-08	7.32459e-05	675.374	-0.449133	0.0848787	-5.29147	1.21334e-07	7.65256e-05
ISLR	361.899	0.398991	0.0974115	4.09593	4.2047e-05	0.0129104	247.935	0.420729	0.0841539	4.99952	5.74724e-07	0.000289838
VAT1L	892.581	0.413763	0.0952911	4.34209	1.41133e-05	0.00595847	1740.16	0.360698	0.0826275	4.36535	1.26919e-05	0.00387014
CPED1	138.01	0.479979	0.0957033	5.01528	5.29553e-07	0.000511019	94.2597	0.36347	0.0846594	4.29332	1.76022e-05	0.00501739
KCNJ13	764.067	0.414791	0.0942455	4.40118	1.07665e-05	0.0048485	331.219	0.358073	0.0840145	4.26204	2.02572e-05	0.00531226
CDR2	1287.01	0.355005	0.0865046	4.10389	4.06263e-05	0.0129104	886.886	0.310442	0.0729754	4.25407	2.09921e-05	0.00539702
SVEP1	289.511	-0.388999	0.0945207	-4.1155	3.86347e-05	0.0129104	403.843	-0.351312	0.0833915	-4.21281	2.52216e-05	0.00592859
TMEM72	790.39	0.448403	0.096583	4.64267	3.43938e-06	0.00178715	804.916	0.329526	0.0809376	4.07137	4.67383e-05	0.00957551
CDKN1C	604.7	0.798995	0.0934014	8.55442	1.1846e-17	4.001e-14	418.038	0.341758	0.0848659	4.02704	5.64834e-05	0.0107335
CLIC6	2510.47	0.455443	0.0943347	4.82795	1.37945e-06	0.000931819	2107.22	0.337476	0.0844325	3.997	6.4151e-05	0.0118756
SHOX2	49.1663	0.563094	0.0849086	6.63176	3.31706e-11	7.46892e-08	10.2431	0.206962	0.052872	3.9144	9.06306e-05	0.0161995
SFRP1	259.094	0.341498	0.0972059	3.51314	0.00044285	0.0972758	266.466	0.326005	0.084174	3.87299	0.000107508	0.0183072
TEX15	327.977	0.405367	0.0863124	4.69651	2.64645e-06	0.00148973	241.177	0.29717	0.0776025	3.82938	0.000128465	0.0207955
GUCY1A3	793.264	0.297559	0.0835012	3.56352	0.000365908	0.0852313	754.687	0.259755	0.0718283	3.61634	0.0002988	0.0435319
ITPRIPL1	439.076	0.41425	0.0966175	4.28753	1.80674e-05	0.00717915	121.7	0.298174	0.0830722	3.58934	0.000331521	0.0457568
EXPH5	409.723	0.381557	0.0974563	3.91516	9.03436e-05	0.025428	205.053	0.278238	0.080732	3.44644	0.000568025	0.0677086
SH3PXD2B	156.46	-0.485213	0.0974179	-4.98074	6.33415e-07	0.00053484	92.7149	-0.286833	0.0847813	-3.38321	0.000716433	0.076999
PLEKHG5	1882.12	-0.300546	0.0804466	-3.73597	0.000186994	0.0485826	4115.98	-0.230037	0.0693333	-3.31784	0.000907168	0.0901121
AEBP1	1598.93	0.363264	0.0884805	4.10558	4.03306e-05	0.0129104	1169.65	0.243542	0.0738437	3.29807	0.000973524	0.0938592
